# Supplementary material
Source: PubMed Central journal article supplement (PMC5937687)
Supplement: NIHMS963335-supplement-Supplemental_material.pdf [file NIHMS963335-supplement-Supplemental_material.pdf]

Supplementary Material for

THE VIOLACEIN BIOSYNTHETIC ENZYME VIOE SHARES A FOLD WITH LIPOPROTEIN  
TRANSPORTER PROTEINS

Katherine S. Ryan, Carl J. Balibar, Kaitlyn E. Turo, Christopher T. Walsh, Catherine L. Drennan

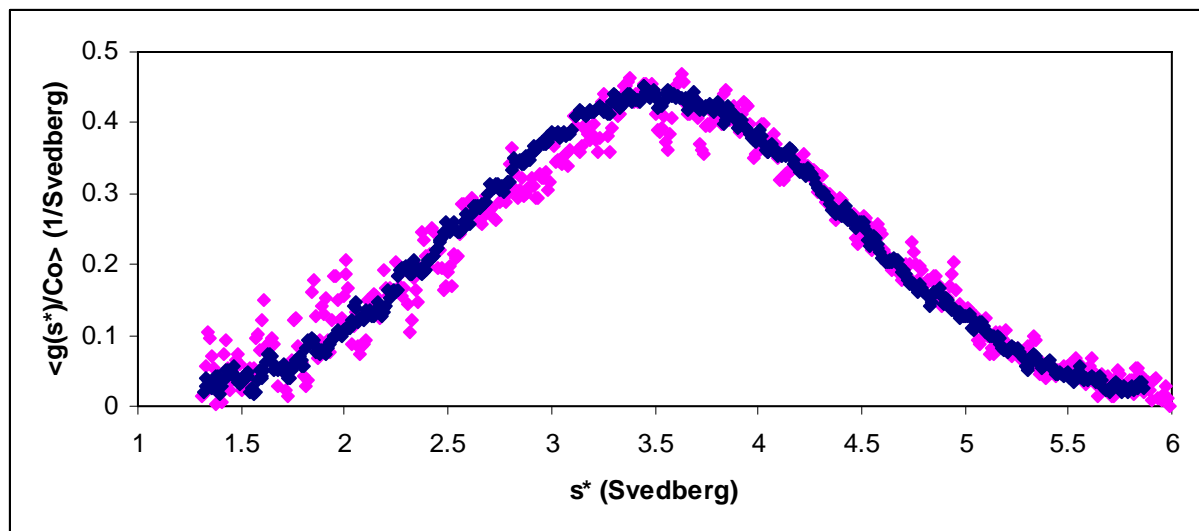

FIGURE S1. **Sedimentation velocity experiments.** Sedimentation velocity experiments were performed on VioE at observed loading concentrations of 8.6  $\mu\text{M}$  and 2.8  $\mu\text{M}$ . The single species model fit to this data using Sedanal gives a molecular mass of 45,879 g/mol (calculated molecular mass of C-terminally tagged VioE dimer is 45,685 g/mol). Determination of F-statistics gives a range of 41,200 to 51,000 g/mol for the molecular mass of the observed species, with a confidence level of 95%. These data are highly consistent with a VioE dimer in solution and are inconsistent with a VioE monomer or trimer in solution. Plots of the sedimentation distribution function normalized to loading concentrations are shown as a function of the sedimentation coefficient in Svedbergs, with the 8.6  $\mu\text{M}$  sample shown in blue and the 2.8  $\mu\text{M}$  sample shown in pink.

**A**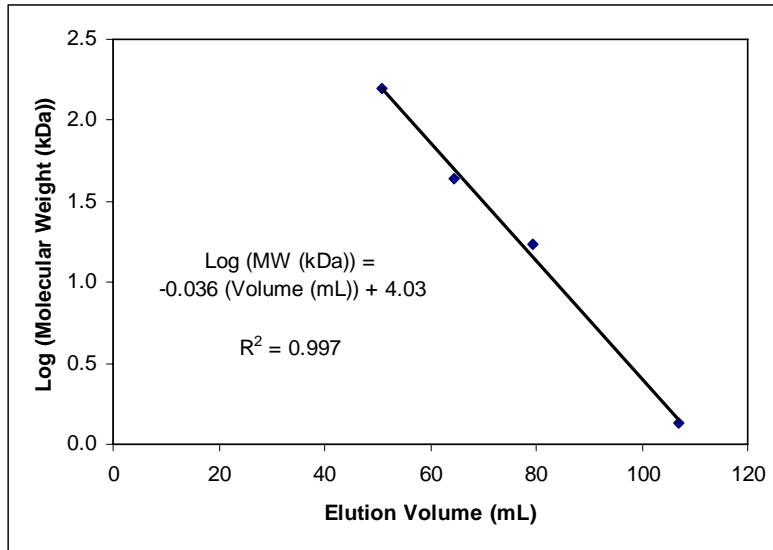**B**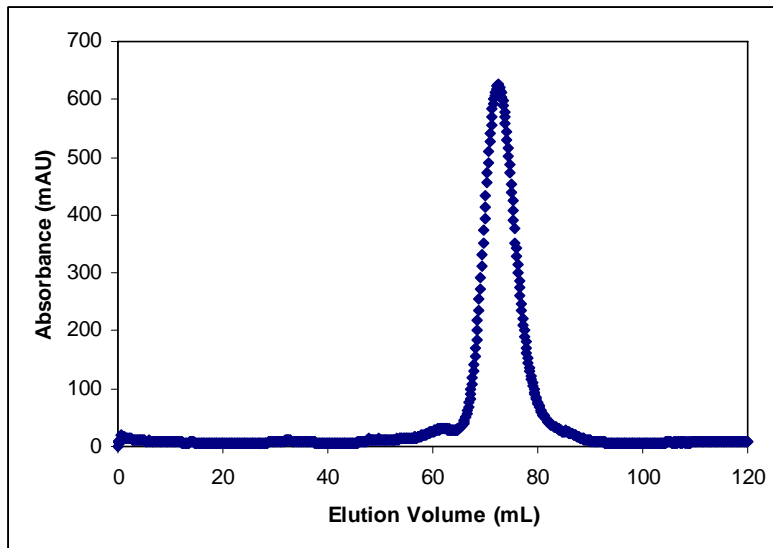

**FIGURE S2. Gel filtration of VioE.** Protein purified from a nickel (II) loaded Chelating Sepharose™ Fast Flow column was loaded onto a HiLoad Superdex™ 75 prep grade column. This column was previously calibrated using gel filtration standards, with bovine thyroglobulin (670 kDa) eluting at 46.8 mL, bovine  $\gamma$ -globulin (158 kDa) eluting at 51.0 mL, chicken ovalbumin (44 kDa) eluting at 64.6 mL, horse myoglobin (17 kDa) eluting at 79.4 mL, and Vitamin B<sub>12</sub> (1.4 kDa) eluting at 107.0 mL. **A.** A standard curve was generated for the column using these standards, using the logarithm (base-10) of the molecular weight (in kDa) as a function of elution volume (in mL), excluding the value for bovine thyroglobulin, which is not on the linear portion of the curve. The linear regression equation and  $R^2$  value are shown. **B.** VioE elutes as one major peak at 72.5 mL. This corresponds, based on the standard curve, to a calculated molecular weight of 26.3 kDa. The molecular weight of VioE (including the C-terminal tag) is 22.8 kDa, and the calculated dimeric molecular weight is 45.7 kDa. The peak corresponding to the calculated molecular weight of 26.3 kDa is more likely to represent monomeric VioE.

```

JLD      ---MPTHVSPPLLPQWSSAYVSYWTPMQADDQVTSGYCWFDYARNICRIDGLFNPWSEK 57
JLB      ---MSIQVAPPLLPKWSSAYISYWTPMQEDDQVTSGYCWFDYARNICRIDGLFNPWPEK 57
CV       ---MENRE-PPLLPARWSSAYVSYWSPMLPDDQLTSGYCWFDYERDICRIDGLFNPWSEK 56
PT       MQLSKITKKPPLLPQWSSSYISYWMPMQPDDDDITSGYCWFDYTKNVCRIDGIFNPWPEI 60
          ***** :***:*:** **  *::***** :::*****:***.*

JLD      EHGHLWMSEIGDARREQSRKQKVAYARQAEAAEQQLQGTALADEVTPFHFLFPQAVLL 117
JLB      EHGHLWMSEIGDARREQSRKQKVAYARQAGATGEQLQGTALADEVTPFHFLFPQAVLL 117
CV       DTGYRLWMSEVGNAAAGRTWKQKVAYGRERTALGEQLCERPLDDETFPFAELFLPRDVLK 116
PT       KMGNRLWMSEIMYPNTDESFKSKVAYAREDMKSISEFSAQVLDEIDPCHELILTQKVLK 120
          . * *****: . .:*.****.*: .:: * ** * **:*.: **

JLD      DGGARHDGRHTVLGREADAWVVERA-GKPPSVFYLEAGGNRLRMVTGNDPQHLSVRDFP 176
JLB      DGSARHDGRHTVLGQREADAWMERA-GKPPSVFYLEAGGNRLRMVTGNDPQHLSVRDFP 176
CV       RLGARHIGRRVVLGREADGWRYPQ-RGKGPSTLYLDAASGTPLRMVTGDEASRASLRDFP 175
PT       ECNAQYMGIEITVLGHQAEKWLFRPDNKGPATYYFINGTNHLVRMITGDPKICASVRDFP 180
          .*:: * ..*****:*: * :*. .* *: .: . . :***:**: *:*:**

JLD      NLFVSDIPDSVFTSCNT-- 193
JLB      NLFVGDIPDSVFTSCNT-- 193
CV       NVSEAEIPDAVFAAKR--- 191
PT       NFNTYKIDNEIFKPEPLKK 199
          *. . * : : * .

```

FIGURE S3. **Homologues of VioE.** A ClustalW alignment of the closest homologues of VioE from *Chromobacterium violaceum* ATCC 12472 (indicated as ‘CV’) is shown. The homologue from *Janthinobacterium lividum* DSM 1522 is indicated as ‘JLD,’ the homologue from *Janthinobacterium lividum* BP is indicated as ‘JLB,’ and the homologue from *Pseudoalteromonas tunicata* D2 is indicated as ‘PT.’ Identical residues are indicated with \*, and similar residues are indicated with one or two dots, according to the conventions of ClustalW.

|      |     |                                             |     |
|------|-----|---------------------------------------------|-----|
| VioE | 86  | RTALGEQLCERPLDDETGPFAELFLPRDVLRRRLGARHIGRRV | 127 |
| RifG | 2   | RTTIPVRLAERSYDVLVGPVRAALP-EVVRRLGAR---RAV   | 39  |
|      |     |                                             |     |
| VioE | 128 | VLGREADGWRYQRPKGPSSTLYLDAASGTPLRMVTGDE      | 165 |
| RifG | 40  | VVSARPADWV---PGTGVETLLLQARDGEPTKRLSTVE      | 74  |

FIGURE S4. **Comparison of VioE to RifG.** RifG, a 351 amino acid protein from *Amycolatopsis mediterranei*, shows similarity to VioE, a 191 amino acid protein. RifG aligns at its N-terminus to the central region of the VioE sequence. Shown are only the residues aligned from a BLAST search. Based on the VioE structure, the highest identity is in the loop that connects  $\beta 6$  to  $\beta 7$ , bridging one side of the protein to the other. RifG is a putative 5-amino 3-dehydroquinase synthase (1), thought to carry out a cyclization of 3,4-dideoxy-4-amino-D-arabino-heptulosonic acid 7-phosphate (2). Heterologous expression studies have shown that RifG is involved, together with RifJ and RifH, in the synthesis of 3-amino-5-hydroxybenzoic acid (1). It is unclear what RifG's similarity to VioE reveals about either protein. Yellow highlighting indicates identical residues, whereas gray highlighting indicates similar residues.

```

VioE 1  -----MENREP 6
LolA 1  -----DAAS-----D 5
LolB 1  ASVTTPKGPGKSPD SPQWRQHQQDVRNLNQ----- 30

VioE 7  PL--L--PARWSSAYVS-Y-WSPMLPDD-----Q- 29
LolA 6  LKSRLDKVSSFHASFTQ-KVT-----DG--SGAAVQ- 33
LolB 31  -----YQTRGAFAY--I-----SD-QQ-----KV 46

VioE 30  LTSGYCWFYD-Y-E-R-DICRIDG----LFPNWSERDTGYRL 62
LolA 34  EGQGLWVQR-P---NLFNWHMTQPD----- 55
LolB 47  -YARFFWQQ-TGQ-DRYRLLLTN----- 66

VioE 63  -----WMSEVGNAAS--GRTWKQ--KVAYGRERTALGEQL 93
LolA 56  -----ESILVSD-GK---TLWIFY--NPF----- 72
LolB 67  PLGST-ELELNAQ--PGNVQLV-DNK----- 88

VioE 94  CERP-L--DDETGP-FA--EL----- 108
LolA 73  ----VEQ---ATATWLKDAT-GNTPF----- 90
LolB 89  -----G-QRYTAD-D-----AEEMIGKLTGMPIP 110

VioE 109 F--LP-RD-----VLR---R-----LGARHI-G 124
LolA 91  M-LIARNQ-----SSDWQQYN-----IKQ--N 109
LolB 111 LNSLR-Q-WILGLPG-----D-----ATDYK-L- 130

VioE 125 RRVVLGREA-----DGWRYQRPGK-----GPS-TL- 148
LolA 110 -----G-----DDFVLTP---KSNGNLQKF-TI- 129
LolB 131 -----DDQYRLSEITYS-QN-G-----KNWKV-V 151

VioE 149 YLDAA-----SG-T-PLRMVTGDEASR----ASLR 172
LolA 130 NVG--R-----DG-T-IHQFSAV----EQDQRSSY 152
LolB 152 Y-----GGYDTKTQPA-MPA-NMELTDG---G----QRIK 177

VioE 173 DFPNVSEA--EIPDAVFAAKR----- 191
LolA 153 QLKSQQNG--AVDAAKFTFTPQGVTVDDQRK 182
LolB 178 LKMDNW-IVK----- 186

```

FIGURE S5. **Structure-based sequence alignment of VioE, LolA, and LolB.** The structure of VioE was individually aligned using LSQMAN (3) to the structures of LolA and LolB (4), which, based on analysis using DALI (<http://www.ebi.ac.uk/dali/>), had significantly higher structural homology to VioE than did any other published protein structures. A final structural alignment was generated where distances between Ca carbons were within 3.5 Å. Structurally aligned sequences of VioE, LolA (PDB code 1UA8), and LolB (PDB code 1IWM) are shown with secondary structure assignments (blue text indicates β-sheets and red text indicates α-helices and <sub>310</sub> helical turns). Gray highlighting indicates residues disordered in the crystal structures.

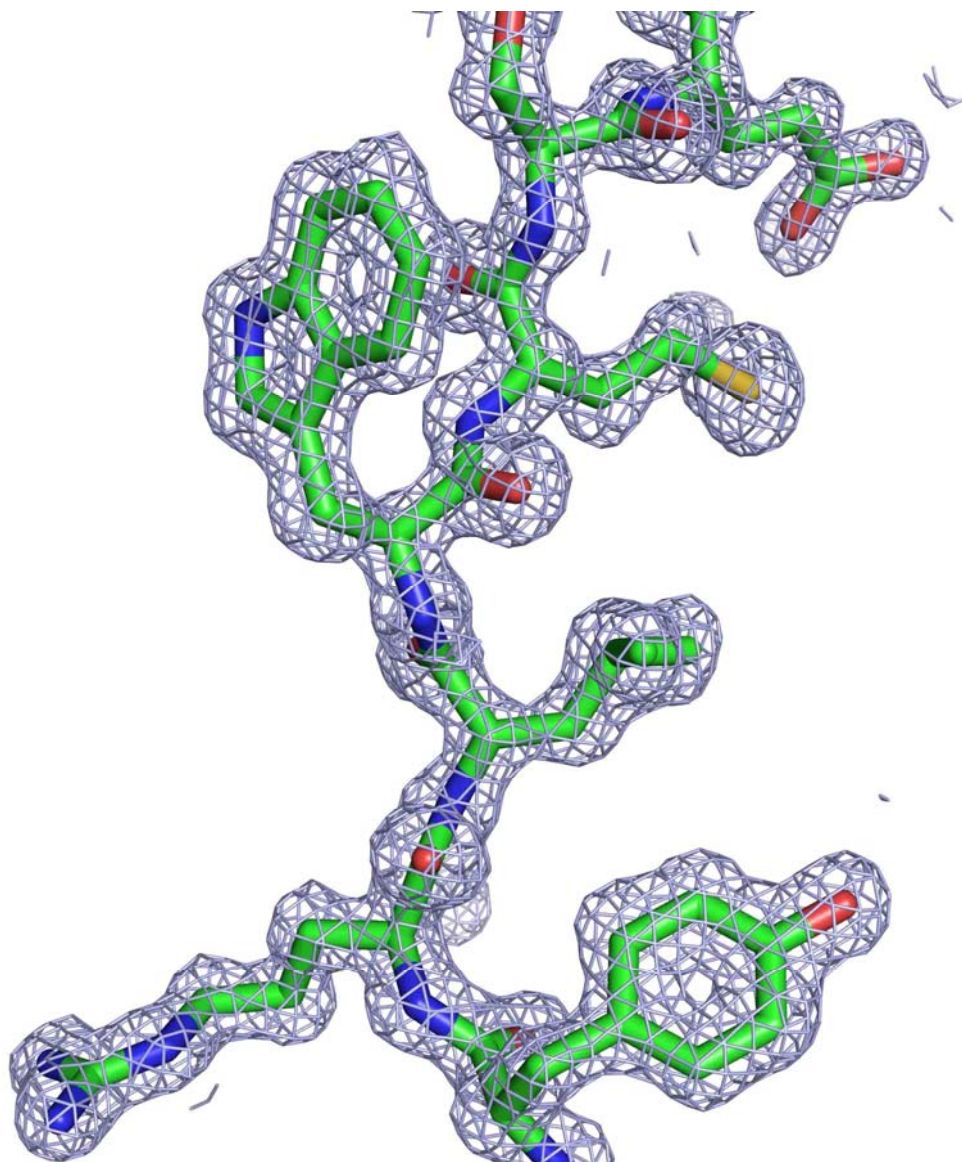

FIGURE S6. **Electron density for VioE.** Seven residues (Tyr<sup>60</sup>, bottom, to Glu<sup>66</sup>, top) are shown in a 1.5  $\sigma$  sigmaA-weighted  $2F_o-F_c$  map. The high quality of the electron density over most of the structure, including this segment, is in contrast to the lower quality of density surrounding the PEG molecules.

**A**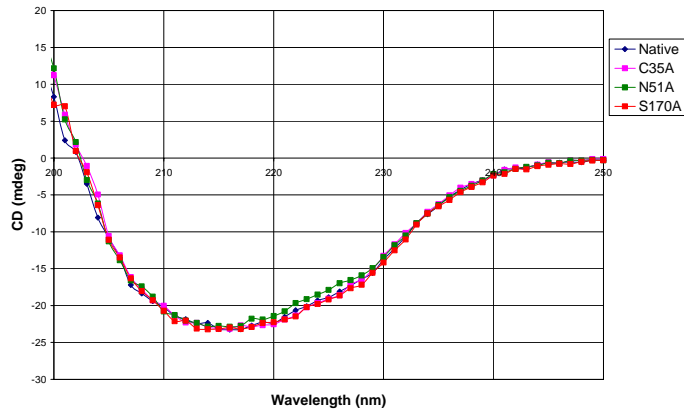**B**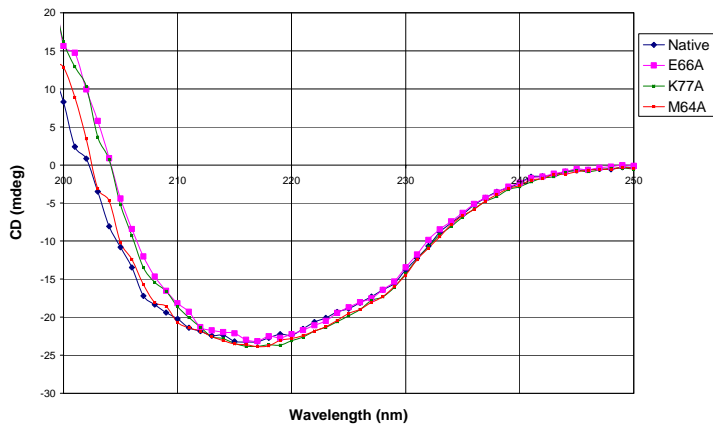**C**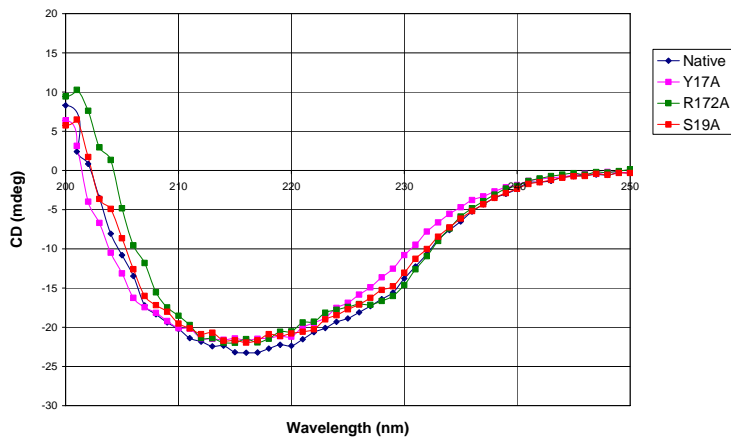

**FIGURE S7. CD Spectra of mutant proteins.** Circular dichroism spectra of all mutants appear similar to that of wildtype VioE, suggesting that all mutants are properly folded. a) Native versus Cys35Ala, Asn51Ala, and Ser170Ala. b) Native versus Glu66Ala, Lys77Ala, and Met64Ala. c) Native versus Tyr17Ala, Arg172Ala, and Ser19Ala.

TABLE S1: **Primers used for generation of site-directed mutants.** Bold text within oligonucleotide sequences indicates restriction digest sites, italicized text indicates modified overhangs, and underlined text indicates the modified codon.

| Protein            | Fragment       | Sequence                                            |
|--------------------|----------------|-----------------------------------------------------|
| <b>All mutants</b> | a – 5' forward | <i>caagttac</i> <b>catatg</b> ggttaaccgcccgtacgc    |
|                    | b – 3' reverse | <i>caagttactc</i> <b>gagctc</b> gctatctgtaatcacgctc |
| <b>VioE Y17A</b>   | a – 3' reverse | catcggactccagtagcacacc <u>cg</u> gcgctgctcca        |
|                    | b – 5' forward | ccggcgcgctggagcagcgc <u>cg</u> cggtgctgactgg        |
| <b>VioE S19A</b>   | a – 3' reverse | cggcagcatcggactccagtagc <u>cc</u> acataggcgct       |
|                    | b – 5' forward | cgctggagcagcgcctatgt <u>ggc</u> gtactggagtcgg       |
| <b>VioE C35A</b>   | a – 3' reverse | gtcgcgctcgtagtcgaaccac <u>cg</u> ctagccggacgt       |
|                    | b – 5' forward | gaccagctgacgtccggctac <u>cg</u> ctggttcgactac       |
| <b>VioE N51A</b>   | a – 3' reverse | ggtgtcgcgctccgaccagg <u>gc</u> ggaacaggcgcgtc       |
|                    | b – 5' forward | tgctggatagacggcctgtt <u>cg</u> ccctggtcggag         |
| <b>VioE M64A</b>   | a – 3' reverse | ggcggcgttcccacctcggac <u>cg</u> cccacagccggta       |
|                    | b – 5' forward | gacaccggctaccggctgt <u>ggc</u> gtcggaggtcggc        |
| <b>VioE E66A</b>   | a – 3' reverse | gccgctggcggcgttccgac <u>cg</u> ggacatccacag         |
|                    | b – 5' forward | ggctaccggctgtggatgtcc <u>cg</u> gtcggcaacgcc        |
| <b>VioE K77A</b>   | a – 3' reverse | gcgccatagggcaccttct <u>gc</u> cccagggtcggcc         |
|                    | b – 5' forward | gccgccagcggccgcacct <u>ggc</u> gcagaaggtggcc        |
| <b>VioE S170A</b>  | a – 3' reverse | gacgttgggaaatcgcgcag <u>cg</u> ccgcgcgcgacgc        |
|                    | b – 5' forward | ggggacgagcgtcgcgcg <u>cg</u> ctgctgcgcgatttc        |
| <b>VioE R172A</b>  | a – 3' reverse | ctcgtgacgttgggaaatcc <u>cc</u> cagcgcgcgcg          |
|                    | b – 5' forward | gaggcgtcgcgcgctgct <u>ggc</u> ggttccccaac           |

## REFERENCES

1. Yu, T. W., Muller, R., Muller, M., Zhang, X., Draeger, G., Kim, C. G., Leistner, E., and Floss, H. G. (2001) *J. Biol. Chem.* **276**(16), 12546-12555
2. Watanabe, K., Rude, M. A., Walsh, C. T., and Khosla, C. (2003) *Proc. Natl. Acad. Sci. U. S. A.* **100**(17), 9774-9778
3. Kleywegt, G. J. (1996) *Acta Crystallogr. D Biol. Crystallogr.* **52**(Pt 4), 842-857
4. Takeda, K., Miyatake, H., Yokota, N., Matsuyama, S., Tokuda, H., and Miki, K. (2003) *EMBO J.* **22**(13), 3199-3209
